# Supplementary material for: Disorder‐to‐order transition in PE–PPE proteins of Mycobacterium tuberculosis augments the pro‐pathogen immune response
Source: PubMed Central journal article supplement (PMC6943233; doi:10.1002/2211-5463.12749), 2019-12-17
Supplement: FEB4-10-70-s001.pdf [file FEB4-10-70-s001.pdf]

Figure S1

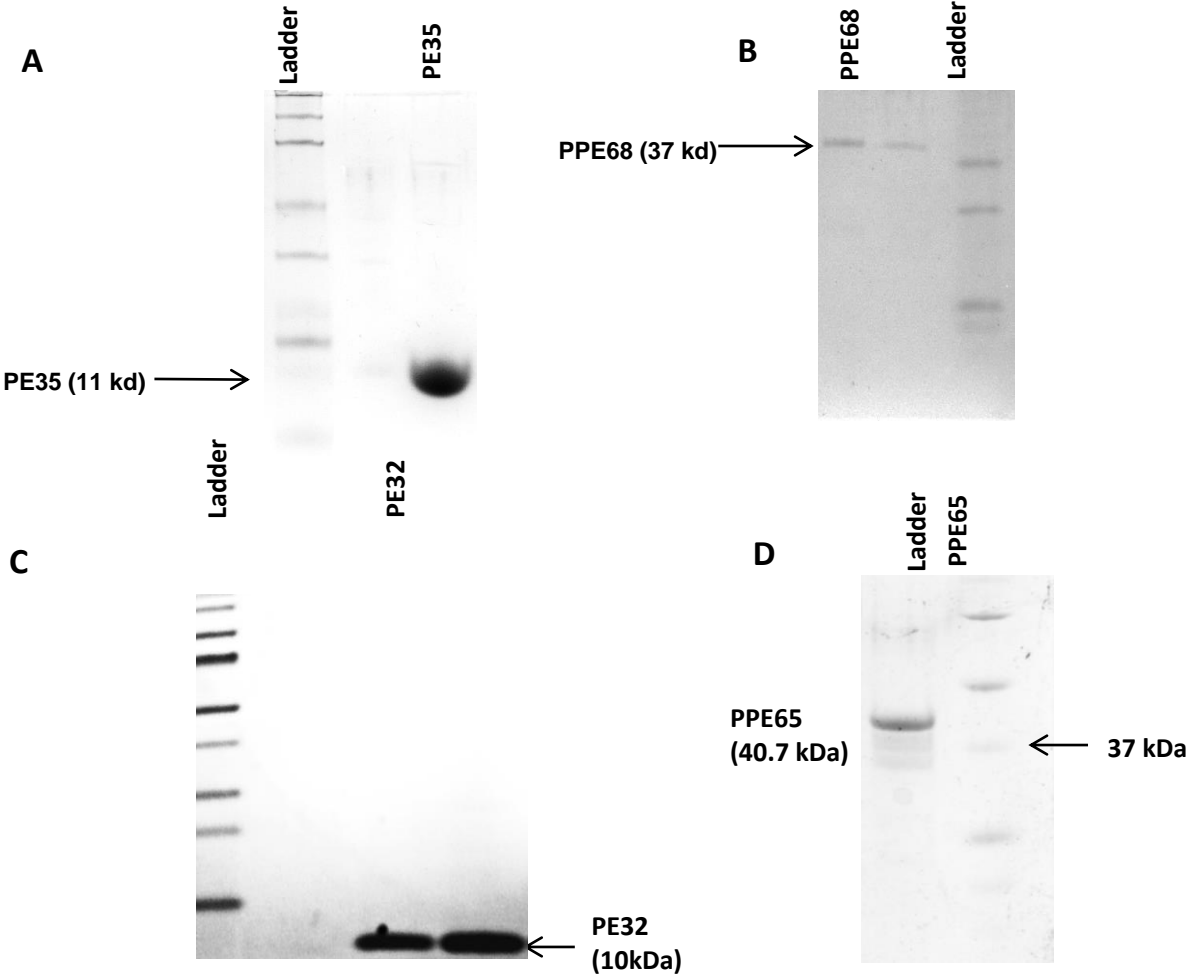

Figure S1: SDS-PAGE image of the purified PE32, PPE65, PE35 and PPE68 proteins.

**Figure S2**

|             | Disordered<br>(80-100%) | Partially Disordered<br>(20-80%) | Ordered<br>(0-20%) |
|-------------|-------------------------|----------------------------------|--------------------|
| PPE(69)     |                         | 65                               | 4                  |
| PE(35)      | 1                       | 32                               | 2                  |
| PE_PGRS(64) | 31                      | 31                               | 3                  |

**Figure S2: Structural analysis of the PE-PPE/PGRS protein family using RONN.**

Each subfamily was divided into three groups, i.e. completely disordered members with more than 80% disorder, partially disordered members with disorder between 20-80% and ordered proteins having less than 20% structural disorder

Figure S3

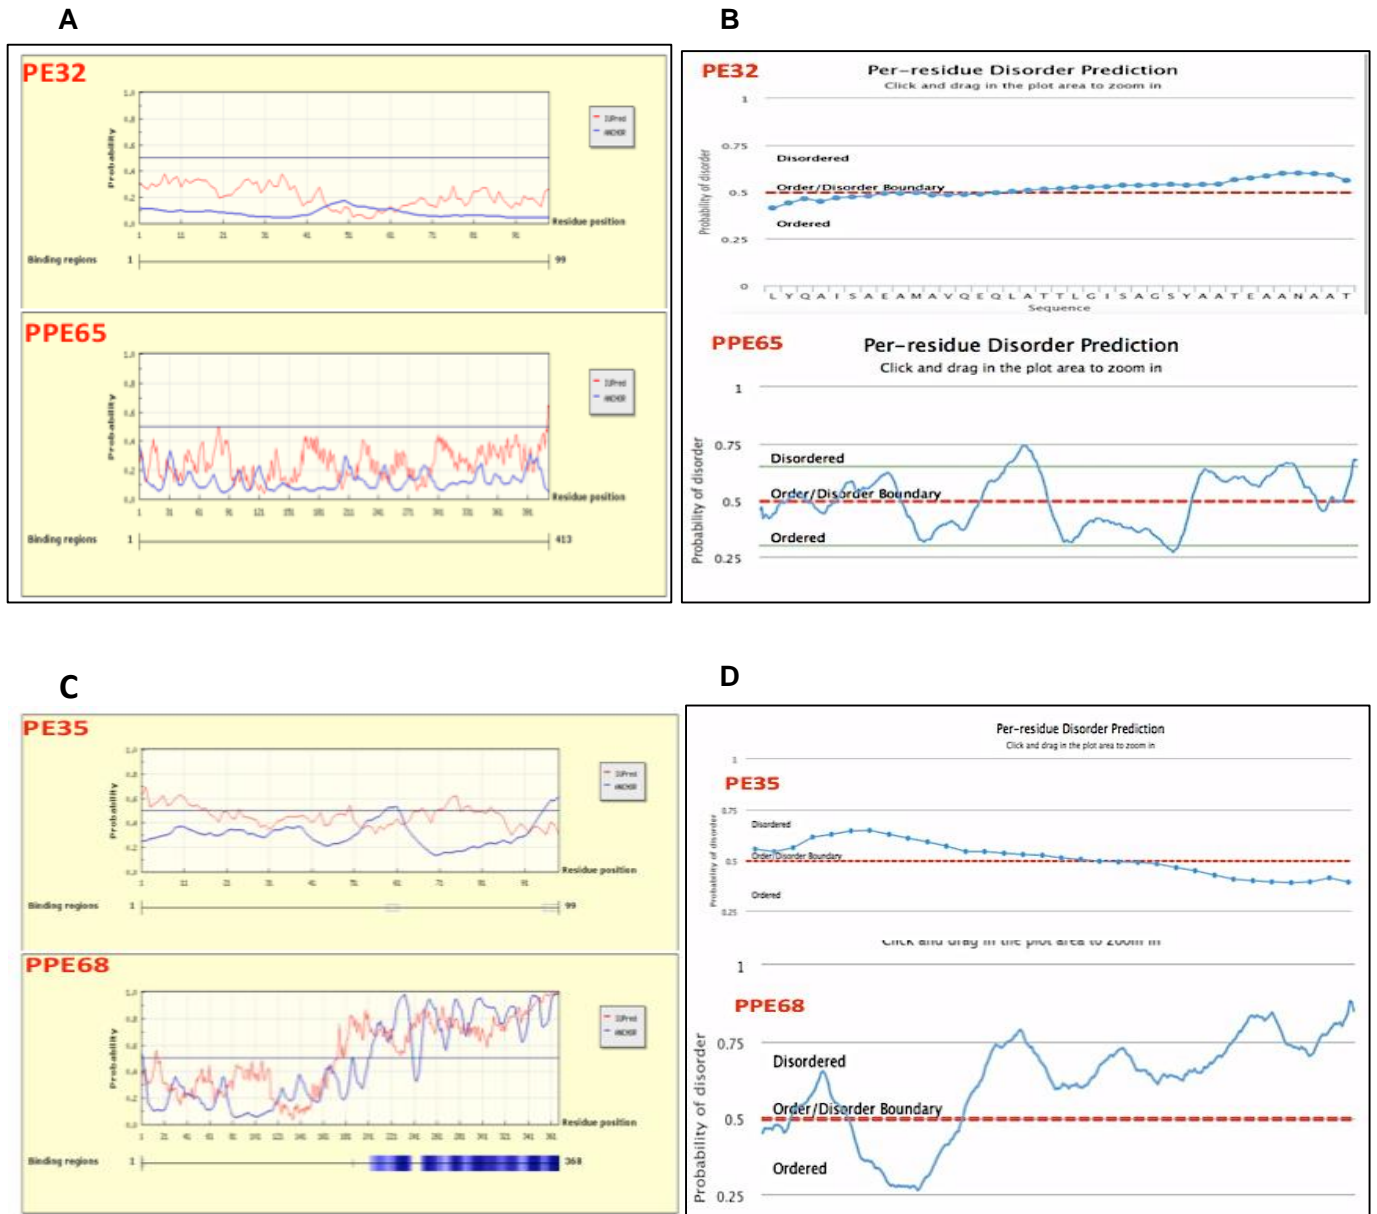

**Figure S3: Structural disorder predictions for PE32, PE35, PPE65 and PPE68:** (A) Predicted IUPred disordered regions and disordered binding sites using the ANCHOR tool in PE32 and PPE65. (B) Predicted disordered regions in PE32 and PPE65 using RONN. (C) Predicted IUPred disordered regions and disordered binding sites in PE35 and PPE58 using ANCHOR. (D) Disordered regions in PE35 and PPE68 as predicted by the RONN tool.

Figure S4

(A)

```
CLUSTAL O(1.2.4) multiple sequence alignment
PE25_MYCTU MSFVITNPEALTVAATEVRRIRDRAIQSDAQVAPMTTAVRPPAADLVSEKAATFLVEYAR 60
PE32_MYCTU MSIMHAEPEMLAATAGELQSIGNAVARAGNAAVAGPTTGVVPAADLVSLLTASQFAAHAQ 60
PE35_MYCTU MEKMSHDPIAADIGT-QVSDNALHGVTAGSTALTSVTGLVPAGADEVSAQAATAFTSEGI 59
* . : :* : : . . . : . * . : * . * * * * : * : : . .
PE25_MYCTU KYRQTIAAAAAVLVEEFAHALTTGADKYATAEADNIKTFS- 99
PE32_MYCTU LYQAISAEAMAVQEQLATTLGISAGSYAATEANAATIA- 99
PE35_MYCTU QLLASNASAQDQLHRAGEAVQDVARTYSQIDDGAAGVFAE 99
* * . . . : : * . * : : : :
```

(B)

```
CLUSTAL O(1.2.4) multiple sequence alignment
PPE41_MYCTU -MHFEAYPPEVNSANIYAGPGPDSMLAAARAWRSLDVEMTAVQRSFNRTLLSLM-DAWAG 58
PPE65_MYCTU MLDFAQLPPEVNSALMYAGPGSGPMLAAAAWEALAELOTTASTYDALITGLADGPWQG 60
PPE68_MYCTU -MLWHAMPPELNTARLMAGAGPAPMLAAAAGWQTLAALDAQAVELTARLNSLG-EAWTG 58
: : * * * : * * : * * * * * * * . * : * . : : : . * * *
PPE41_MYCTU PVVMQLMEAAKPFVRWLTDLVQLSEVERQIHEIVRAYEWAHDMVPLAQIYNNRAERQI 118
PPE65_MYCTU SSAASMVAAATPQVAWLRSTAGQAEQAGSQAVAAASAYEAFFATVPPEIAANRALIMA 120
PPE68_MYCTU GGS DKALAAATPMVVWLQTASTQAKTRAMQATAQAAAYTQAMATTPSLPEIAANHITQAV 118
. : * * . * * * * . * . * . * * * : * * :
PPE41_MYCTU LIDNNALGQFTAQIADLDQEY-DDFWEDEGEVMDRDLRVSDALSCLTPWKAPPPIAHST 177
PPE65_MYCTU LLATNFLGQNTAAIAATEAQY-AEMWAQDAAMGYAGASA-AATQLSPFNPAAQITINPA 178
PPE68_MYCTU LTATNFFGINTIPIALTEMDYFIRMWNQAALAMEVYQAETAV-NTLFEKLEPMASILDPG 177
* . * : * * * * : : * : * : . . * * : : : : .
PPE41_MYCTU VLVAP---VSP---ST--ASSRTDT----- 194
PPE65_MYCTU GLASQAASVGVQAVSQAANAQALTDIPKALFGLSGIFT-----NEPPWLT-DLGKALGLTG 232
PPE68_MYCTU ASQS-----TTNPIFGMPSPGSSTPVQGQLPPAATQTLGQLGEMSG 217
:
PPE41_MYCTU -----
PPE65_MYCTU HTWSSDGSLIVGGVLDGDFVQGVGTGSAELDA-SVAMDTFGKWVSPARLMVTQFKDYFGLA 291
PPE68_MYCTU PMOQLTQPLQOVTSLF-SQVGGTGGGNPADEEAAQMGLLGTSP----LS-----N 262
PPE41_MYCTU -----
PPE65_MYCTU HDLPKWASEGAKAAGEAAKALPAAVPAIPSAAGLSGVAGAVGQAASVGGGLKVPVWTATTP 351
PPE68_MYCTU H--PLAGGSGPSA-G-----AGLLRAESLPGAGGSLTRTPMLMSQLI----EKPVAP 306
PPE41_MYCTU -----
PPE65_MYCTU AASPAVLAASNGLGAAAAAEGSTHAFGGMPLMGSGA-GRAFNNFAAPRYGFKPTVIAQPP 410
PPE68_MYCTU SVMPAAGSS-----ATGGAAPVGAGAMGQAQSGG----STRPGLVAPAP 349
PPE41_MYCTU -----
PPE65_MYCTU AGG----- 413
PPE68_MYCTU LAQEREDEDDWDEEDDW 368
```

Figure S4: Alignments of our investigated PE and PPE proteins to those with available complex structure. The (A) PPE41, PPE65 and PPE68 proteins as well as the (B) PE25, PE32 and PE35 proteins were aligned using Clustal Omega 1.2.4. The regions of the PPE and PE domains are marked by light grey and yellow backgrounds, respectively.

Figure S5

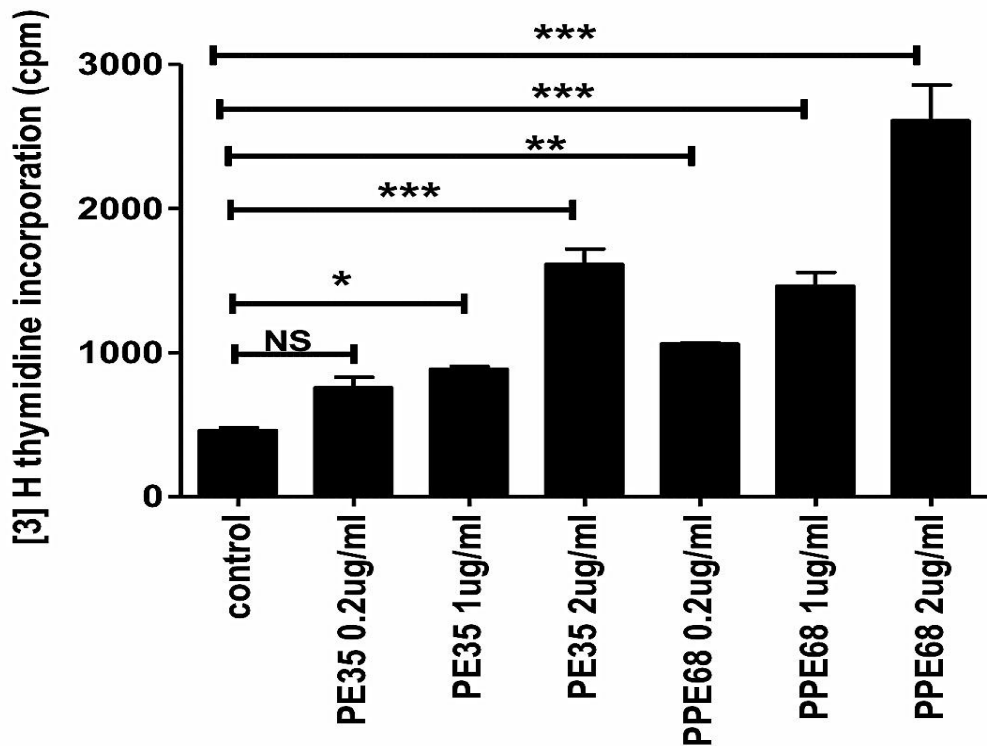

**Figure S5: Individual recombinant PE35 and PPE68 proteins induce cell proliferation.** Different concentrations of individual recombinant proteins were used for re-stimulating the splenocytes in culture for 72 hrs. 3[H] thymidine (0.5mci/ml) was added to each well and incubated at 37o C for 24 hours. Cells were harvested and  $\beta$  scintillation counter was employed for counting Beta activity. Beta activity was significant for the cells re-stimulated with 1  $\mu$ g/ml or higher dose of PE35 while it was significant for 0.2  $\mu$ g/ml or higher dose of PPE68, suggesting PPE68 to be more antigenic. Data represents experiments with three mice in each group . Statistical significance was determined by one-way ANOVA and data represented as mean  $\pm$  SD .  $p$  value  $<0.05$  was considered statistically significant.

Figure S6

PE35

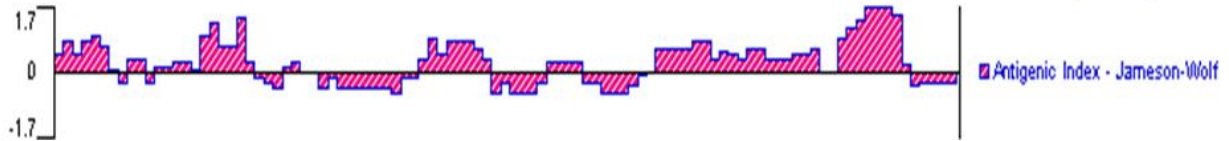

PPE68

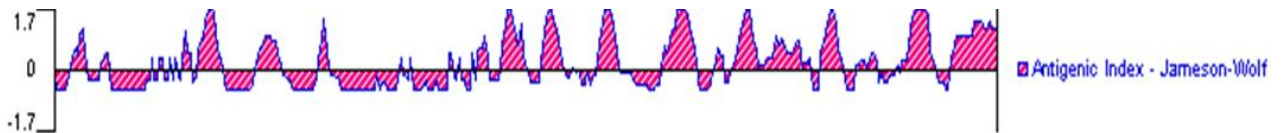

**Figure S6: Antigenic index of PE35 and PPE68.** Antigenicity plots depicting the antigenic regions of PE35 and PPE68.

**Supplementary Table S1: Identifiers of the protein family members and secretome proteins used in the analyses.**

**PE subfamily**

| Gene Id     | Protein name | Gene Id     | Protein name | Gene Id     | Protein name |
|-------------|--------------|-------------|--------------|-------------|--------------|
| YP_177690.1 | PE1          | YP_177794.1 | PE13         | YP_177882.1 | PE25         |
| YP_177696.1 | PE2          | YP_177797.1 | PE14         | YP_177907.1 | PE27         |
| YP_177697.1 | PE3          | YP_177805.1 | PE15         | YP_177685.1 | PE29         |
| YP_177710.1 | PE5          | YP_177810.1 | PE16         | YP_177975.1 | PE31         |
| YP_177717.1 | PE6          | YP_177825.1 | PE17         | YP_177999.1 | PE32         |
| YP_177766.1 | PE7          | YP_177834.1 | PE18         | YP_178000.1 | PE33         |
| YP_177779.1 | PE8          | YP_177837.1 | PE19         |             |              |
| YP_177784.1 | PE9          | YP_177843.1 | PE20         |             |              |
| CCP43841.1  | PE10         | YP_177858.1 | PE22         |             |              |
| YP_177792.1 | PE11/LIPX    | YP_177867.1 | PE23         |             |              |
| YP_177793.1 | PE12         | YP_177880.2 | PE24         |             |              |

**PPE subfamily**

| Gene Id     | Protein name | Gene Id     | Protein name | Gene Id     | Protein name |
|-------------|--------------|-------------|--------------|-------------|--------------|
| YP_177690.1 | PPE1         | YP_177830.1 | PPE24        | YP_177918.1 | PPE46        |
| YP_177704.1 | PPE2         | YP_177833.1 | PPE25        | YP_177932.1 | PPE49        |
| YP_177709.1 | PPE3         | YP_177835.1 | PPE26        | YP_177934.1 | PPE50        |
| YP_177711.1 | PPE4         | YP_177836.1 | PPE27        | YP_177935.1 | PPE51        |
| YP_177714.1 | PPE5         | YP_177839.1 | PPE28        | YP_177936.2 | PPE52        |
| YP_177715.1 | PPE6         | YP_177840_1 | PPE29        | YP_177937.1 | PPE53        |
| YP_177720.1 | PPE7         | YP_177841.1 | PPE30        | YP_177960.1 | PPE54        |
| YP_177721.2 | PPE8         | CCP44573.1  | PPE31        | YP_177963.1 | PPE55        |
| YP_177726.2 | PPE10        | YP_177844.1 | PPE32        | YP_177964.1 | PPE56        |
| YP_177727.1 | PPE11        | YP_177845.1 | PPE33        | YP_177971.1 | PPE57        |
| YP_177753.1 | PPE12        | YP_177655.1 | PPE34        | YP_177972.1 | PPE58        |
| YP_177764.1 | PPE13        | YP_177850.1 | PPE35        | YP_177973.1 | PPE59        |
| YP_177765.1 | PPE14        | YP_177859.1 | PPE36        | YP_177976.1 | PPE60        |
| YP_177778.1 | PPE15        | YP_177861.1 | PPE37        | YP_177984.1 | PPE61        |
| YP_177790.1 | PPE16        | YP_177870.1 | PPE38        | YP_177985.1 | PPE62        |
| YP_177791.1 | PPE17        | YP_177871.1 | PPE39        | YP_177987.1 | PPE63        |
| YP_177795.1 | PPE18        | CCP45144.1  | PPE40        | YP_177988.1 | PPE64        |
| YP_177801.1 | PPE19        | YP_177881.1 | PPE41        | YP_177998.1 | PPE65        |
| YP_177806.1 | PPE20        | YP_177893.1 | PPE42        | YP_178009.1 | PPE66        |
| YP_177817.1 | PPE21        | YP_177906.1 | PPE43        | YP_178010.1 | PPE67        |
| YP_177827.1 | PPE22        | YP_177677.1 | PPE44        | YP_178022.1 | PPE68        |
| YP_177828.1 | PPE23        | YP_177913.1 | PPE45        | YP_178024.1 | PPE69        |

**PE\_PGRS subfamily**

| Gene Id     | Protein Name | Gene Id     | Protein Name | Gene Id     | Protein Name |
|-------------|--------------|-------------|--------------|-------------|--------------|
| YP_177692.1 | PE_PGRS1     | YP_177799.1 | PE_PGRS24    | YP_177909.1 | PE_PGRS48    |
| YP_177693.1 | PE_PGRS2     | YP_177809.1 | PE_PGRS25    | YP_177961.2 | PE_PGRS49    |
| YP_177707.1 | Rv0278c      | YP_177811.1 | PE_PGRS26    | YP_177962.1 | PE_PGRS50    |

|             |           |             |           |             |           |
|-------------|-----------|-------------|-----------|-------------|-----------|
| YP_177708.1 | PE_PGRS4  | YP_177812.1 | PE_PGRS27 | YP_177965.1 | PE_PGRS51 |
| YP_177713.1 | PE_PGRS5  | YP_177813.1 | PE_PGRS28 | YP_177968.1 | PE_PGRS52 |
| YP_177736.1 | PE_PGRS6  | YP_177814.1 | PE_PGRS29 | YP_177978.1 | PE_PGRS53 |
| YP_177739.1 | PE_PGRS7  | YP_177826.1 | PE_PGRS30 | YP_177979.1 | PE_PGRS54 |
| YP_177749.1 | PE_PGRS8  | YP_177832.1 | PE_PGRS31 | YP_177980.1 | PE_PGRS55 |
| YP_177750.1 | PE_PGRS9  | YP_177842.1 | PE_PGRS32 | YP_177981.2 | PE_PGRS56 |
| YP_177751.1 | PE_PGRS10 | YP_177846.1 | PE_PGRS33 | YP_177982.1 | PE_PGRS57 |
| YP_177752.1 | PE_PGRS11 | YP_177847.1 | PE_PGRS34 | YP_177993.1 | PE_PGRS58 |
| YP_177759.1 | PE_PGRS12 | YP_177854.1 | PE_PGRS35 | YP_177994.1 | PE_PGRS59 |
| YP_177760.1 | PE_PGRS13 | YP_177862.1 | PE_PGRS37 | YP_178001.1 | PE_PGRS60 |
| YP_177761.1 | PE_PGRS14 | YP_177865.1 | PE_PGRS38 | YP_178002_1 | PE_PGRS61 |
| YP_177763.1 | PE_PGRS15 | YP_177869.1 | PE_PGRS39 | YP_178019_1 | PE_PGRS62 |
| YP_177773.1 | PE_PGRS16 | YP_177875.1 | PE_PGRS40 | YP_177924.1 | PE_PGRS63 |
| YP_177774.1 | PE_PGRS17 | YP_177878.1 | PE_PGRS41 |             |           |
| YP_177775.1 | PE_PGRS18 | YP_177886.1 | PE_PGRS42 |             |           |
| YP_177780.1 | PE_PGRS19 | YP_177887.1 | PE_PGRS43 |             |           |
| YP_177781.1 | PE_PGRS20 | YP_177891.1 | PE_PGRS44 |             |           |
| YP_177783.1 | PE_PGRS21 | YP_177895.1 | PE_PGRS45 |             |           |
| YP_177786.1 | PE_PGRS22 | YP_177896.1 | PE_PGRS46 |             |           |
| YP_177798.1 | PE_PGRS23 | YP_177902.1 | PE_PGRS47 |             |           |

### Mce family

|             |         |             |         |             |         |
|-------------|---------|-------------|---------|-------------|---------|
| YP_177700.2 |         | YP_177740.1 | RV0589  | NP_214686.1 | Rv0172  |
| NP_215100.1 |         | YP_177852.1 | RV1966  | NP_215106.1 | Rv0592  |
| NP_216479.1 | Rv1963c | NP_218015.1 | RV3498C | NP_216486.1 | Rv1970  |
| NP_218012.1 | Rv3495c | YP_177701.1 | RV0169  | NP_214687.1 | Rv0173  |
| NP_214680.1 | Rv0166  | NP_216483.1 | Rv1967  | NP_215107.1 | Rv0593  |
| NP_215101.1 | Rv0587  | YP_177977.1 | Rv3499c | NP_216487.1 | Rv1971  |
| NP_216480.1 | RV1964  | NP_214684.1 | Rv0170  | NP_214688.1 | Rv0174  |
| NP_218013.1 | Rv3496c | NP_216484.1 | Rv1968  | NP_215108.1 | Rv0594  |
| NP_214681.1 | Rv0167  | NP_218017.1 | Rv3500c | NP_218011.1 | Rv3494c |
| NP_215102.1 | Rv0588  | NP_214685.1 | Rv0171  |             |         |
| NP_216481.1 | Rv1965  | NP_215105.1 | Rv0591  |             |         |
| NP_218014.1 | Rv3497c | NP_216485.1 | Rv1969  |             |         |
| NP_214682.1 | Rv0168  | NP_218018.1 | Rv3501c |             |         |

### MmpL family

|             |         |             |         |             |        |
|-------------|---------|-------------|---------|-------------|--------|
| NP_214716.1 | Rv0202c | NP_216073.1 | Rv1557) | NP_215699.1 | Rv1183 |
| NP_215021.1 | Rv0570  | NP_218340.1 | Rv3823c | NP_215662.1 | Rv1146 |
| NP_216038.1 | RV1522C | NP_214916.1 | Rv0402c |             |        |
| NP_217458.1 | RV2942C | NP_215661.1 | Rv1145  |             |        |
| NP_214720.1 | Rv0206c | NP_216855.1 | Rv2339  |             |        |
| NP_215190.1 | Rv0676c | NP_214964.1 | Rv0450c |             |        |



**Secretome**

| Gene Id     | Gene id     | Gene id     | Gene id     | Gene id     |
|-------------|-------------|-------------|-------------|-------------|
| NP_214684.1 | NP_215391.1 | NP_217510.1 | NP_215954.1 | NP_215868.1 |
| NP_214686.1 | YP_177768.1 | NP_217520.1 | NP_215964.1 | YP_177647.1 |
| NP_214688.1 | YP_177769.1 | NP_217522.1 | NP_215965.1 | NP_216245.1 |
| NP_214864.1 | YP_177770.1 | NP_217532.1 | NP_215970.1 | NP_216245.1 |
| NP_215077.1 | NP_215511.1 | NP_217552.1 | NP_215991.1 | NP_216320.1 |
| NP_215993.1 | NP_215553.1 | NP_217560.1 | NP_216328.1 | NP_216326.1 |
| NP_216424.1 | NP_215554.1 | NP_217709.1 | NP_216349.1 | NP_216331.1 |
| NP_216448.1 | NP_215591.1 | NP_217710.1 | NP_216353.1 | NP_216343.1 |
| YP_177855.1 | NP_215682.1 | YP_177950.1 | NP_216385.1 | NP_216407.1 |
| NP_216706.1 | NP_215690.1 | NP_217761.1 | NP_216392.1 | NP_216422.1 |
| NP_216815.1 | NP_215699.1 | NP_217919.1 | NP_216584.1 | NP_216590.1 |
| NP_217935.1 | NP_215713.1 | NP_218012.1 | NP_216626.1 | NP_216656.1 |
| NP_218276.1 | NP_215714.1 | NP_218101.1 | NP_216708.1 | NP_216830.1 |
| NP_218363.1 | NP_215768.1 | NP_218104.1 | NP_216716.1 | NP_216885.1 |
| YP_177694.1 | NP_215785.1 | NP_218146.1 | NP_216717.1 | NP_217147.2 |
| NP_214756.1 | NP_215786.1 | NP_218146.1 | NP_216736.1 | NP_217339.1 |
| NP_214758.1 | NP_215887.1 | NP_218210.1 | NP_216752.1 | NP_217547.1 |
| NP_214950.1 | NP_215898.1 | NP_218277.1 | NP_216757.3 | NP_217784.1 |
| NP_215590.1 | NP_215951.1 | NP_218352.1 | NP_216767.1 | NP_217871.1 |
| NP_215839.1 | NP_216004.1 | NP_218391.1 | YP_177868.1 | NP_217886.1 |
| NP_216402.1 | NP_216057.1 | YP_178023.1 | NP_216961.1 | NP_218001.1 |
| NP_217347.1 | YP_177838.1 | NP_218435.2 | YP_177884.1 | NP_218144.1 |
| YP_178017.1 | NP_216361.1 | NP_217945.1 | NP_217188.1 | NP_218222.1 |
| NP_218321.1 | YP_177849.1 | YP_177710.1 | YP_177905.1 | NP_218239.2 |
| NP_214516.1 | NP_216400.1 | YP_177727.1 | NP_217364.1 | NP_218398.1 |
| NP_214523.1 | NP_216415.1 | YP_177805.1 | NP_217390.1 | NP_218416.1 |
| NP_214568.1 | NP_216426.1 | YP_177831.1 | NP_217622.1 | NP_215301.1 |
| NP_215145.1 | NP_216427.1 | YP_177881.1 | YP_177927.1 | NP_215514.1 |
| NP_217717.1 | NP_216442.1 | YP_177882.1 | NP_217674.1 | NP_215935.1 |
| NP_214526.1 | NP_216496.1 | YP_178021.1 | NP_217765.1 | NP_216403.1 |
| NP_214554.2 | NP_216500.1 | YP_177689.1 | NP_217827.1 | NP_216917.2 |
| NP_214578.1 | NP_216576.1 | NP_214577.1 | NP_217873.1 | NP_217549.1 |
| NP_214630.1 | NP_216596.1 | NP_214580.1 | NP_217914.1 | NP_217930.1 |
| NP_214687.1 | NP_216596.1 | NP_214589.1 | NP_218002.1 | NP_218008.1 |
| NP_214717.1 | NP_216769.1 | NP_214639.1 | NP_218026.1 | NP_218089.1 |
| NP_214733.1 | NP_216817.2 | NP_214725.1 | NP_218185.1 |             |
| YP_177705.1 | NP_216862.1 | NP_214805.1 | NP_218185.1 |             |
| NP_214797.1 | NP_216892.1 | NP_214829.1 | NP_218227.3 |             |
| NP_214801.1 | NP_216966.1 | NP_214877.1 | NP_218242.1 |             |
| NP_214823.1 | NP_217060.1 | NP_214922.1 | NP_218358.1 |             |
| NP_214912.1 | NP_217079.1 | NP_214976.1 | NP_218431.1 |             |
| NP_214916.1 | NP_217091.1 | NP_215050.2 | NP_214529.1 |             |
| NP_214925.1 | NP_217092.1 | NP_215040.1 | NP_214986.1 |             |

|             |             |             |             |  |
|-------------|-------------|-------------|-------------|--|
| NP_214991.1 | NP_217101.1 | NP_215358.1 | NP_215004.1 |  |
| NP_214965.1 | NP_217184.1 | NP_215366.1 | NP_215497.1 |  |
| NP_215073.1 | NP_217209.1 | NP_215399.1 | NP_214533.1 |  |
| NP_215097.1 | NP_217237.1 | NP_215566.1 | NP_214654.1 |  |
| NP_215191.1 | NP_217315.1 | YP_177782.1 | YP_177617.1 |  |
| NP_215194.1 | NP_217389.1 | NP_215614.1 | NP_214706.1 |  |
| NP_215246.1 | NP_217391.1 | NP_215614.1 | NP_214854.1 |  |
| NP_215288.2 | NP_217391.1 | NP_215677.1 | NP_214969.1 |  |
| NP_215350.1 | NP_217421.1 | NP_215931.1 | NP_215188.1 |  |
| NP_215353.1 | YP_177914.1 | NP_215952.1 | NP_215674.1 |  |
| NP_215382.1 | NP_217461.1 | NP_215953.1 | NP_215702.1 |  |

**Supplementary Table S2: Secondary structure content in the investigated recombinant proteins and their complexes in percentage**

| Recombinant protein | 1615-1625 (unstructured /AAS) | 1630-1640 (beta sheets) | 1640-1650 & 1660-1680 (random coil/loop) | 1650-1660 (alpha helices) | 1680-1705 (turn/beta sheets) |
|---------------------|-------------------------------|-------------------------|------------------------------------------|---------------------------|------------------------------|
| PE32                | 16                            | 10                      | 25                                       | 32                        | 17                           |
| PPE65               | 18                            |                         | 48                                       | 28                        | 16                           |
| PE32&PPE65 complex  | 16                            | 12                      | 16                                       | 36                        | 20                           |
| PE35                | 19                            | 15                      | 25                                       | 23                        | 18                           |
| PPE68               | 24                            |                         | 33                                       | 29                        | 14                           |
| PE35&PPE68 complex  | 10                            | 18                      | 20                                       | 32                        | 20                           |
